# Supplementary material for: Very low rate of humoral response after a third COVID-19 vaccine dose in patients with autoimmune diseases treated with rituximab and non-responders to two doses
Source: HighWire-hosted journal article supplement (doi:10.1136/rmdopen-2022-002308), 2022-05-01

**Supplementary figure 1:** Correlation between anti- spike Ab levels after the third dose and time in days between doses 2 and 3 in days . Horizontal dashed lines represent the response threshold (49 BAU/mL) and the upper quantification limit (243 BAU/mL). Spearman correlations have been performed.

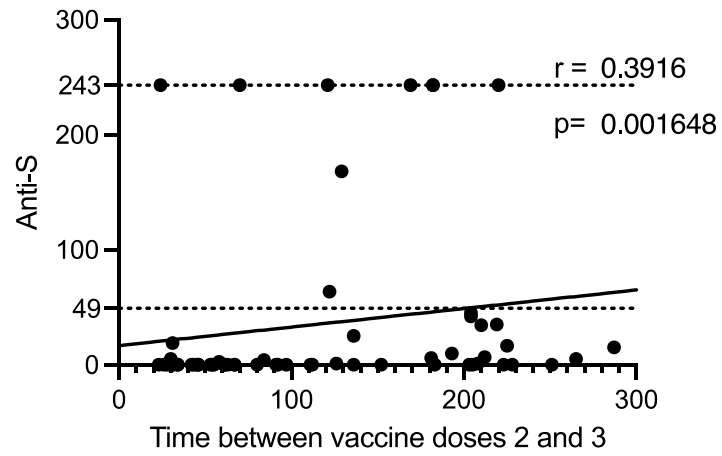

**Supplementary figure 2:** Correlation between anti-spike Ab levels after the third dose and time since last rituximab infusion in days. Horizontal dashed lines represent the response threshold (49 BAU/mL) and the upper quantification limit (243 BAU/mL). Spearman correlations have been performed

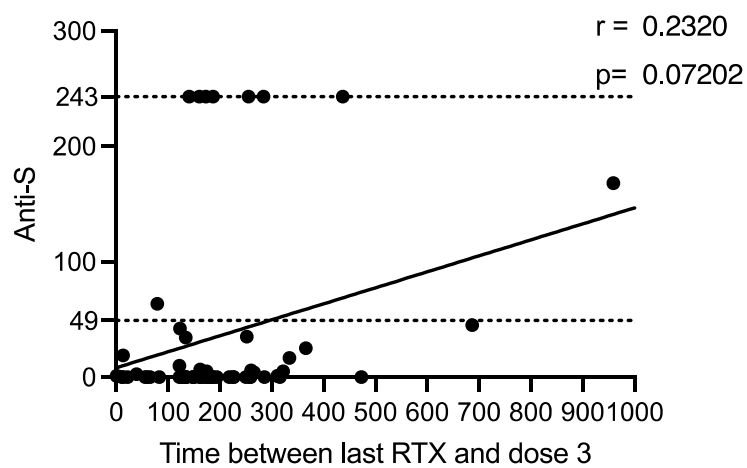

Supplement: rmdopen-2022-002308supp001_data_supplement.pdf [file rmdopen-2022-002308supp001_data_supplement.pdf]
